# Supplementary material
Source: PubMed Central journal article supplement (PMC8295224)
Supplement: NIHMS1711101-supplement-Supplemental_Publication_Material.pdf [file NIHMS1711101-supplement-Supplemental_Publication_Material.pdf]

## **Supplemental Material**

### **Niacin increases atherogenic proteins in HDL of statin-treated subjects**

Graziella E. Ronsein<sup>1,¶</sup>, Tomas Vaisar<sup>2,¶</sup>, W. Sean Davidson<sup>3</sup>, Karin E. Bornfeldt<sup>2</sup>, Jeffrey L. Probstfield<sup>2</sup>, Kevin D. O'Brien<sup>2</sup>, Xue-Qiao Zhao<sup>2</sup>, and Jay W. Heinecke<sup>2,\*</sup>

<sup>1</sup> Department of Biochemistry, Sao Paulo University, SP, Brazil, <sup>2</sup> Department of Medicine, University of Washington, Seattle WA, 98109, <sup>3</sup> Department of Pathology and Laboratory Medicine, University of Cincinnati, Cincinnati OH, 452387

## Supplemental Methods

**Discovery study: targeted proteomic analyses of CPC cohort.** Digested HDL (250 ng protein) was quantified by parallel reaction monitoring, an approach that depends only on the relative abundance and detection efficiency of peptides in MS/MS. A nanoACQUITY UPLC (Waters, Milford, MA) was used for the separation, with a linear gradient of 0.1% formic acid in water (solvent A) and 0.1% formic acid in acetonitrile (solvent B). Samples were desalted on an in-house packed C18 trap column (Waters XBridge BEH C18, 5  $\mu$ m, 0.075 x 40 mm) for 6.5 minutes at 3  $\mu$ L/min in 99% solvent A, and then separated using a C18 column packed in-house (Waters XBridge BEH C18, 3.5  $\mu$ m, 0.075 x 120 mm) with an integrated electrospray emitter pulled by a laser micropipette puller (Sutter Instrument, Novato, CA). Peptides were eluted from the trap column onto the analytical column at a flow rate of 0.6  $\mu$ L/min and separated using multi-step gradient as follows: 1% to 7% solvent B in 2 minutes; 7% to 25% solvent B in 17 minutes; 25% to 35% solvent B in 3 minutes. The column was subsequently washed for 3 minutes at 80% B and re-equilibrated at 99% A for 11 minutes. The column was kept at 50°C. Experiments were performed using a Q Exactive mass spectrometer (Thermo Scientific, San Jose, California). The resolution was set at 17,500 (at  $m/z$  200), the active gain control target at  $5 \times 10^4$ , the maximum fill time at 50 ms, and the individual isolation window at 2 Th. Normalized collision energy of 25 was employed for fragmentation. A scheduled (3-minute window) inclusion list containing  $m/z$  of precursor peptides of interest and corresponding retention times was generated using Skyline software [21].

**Validation study: targeted proteomic analyses of AIM-HIGH subjects** - Tryptic digests of HDL were desalted on a C18 trapping column (Xbridge BEH C18 100 Å, 5  $\mu$ m, 0.1 x 40 mm, Waters) (trapping flow rate 4  $\mu$ L/min), separated on a capillary analytical column (XBridge BEH C18 100 Å, 3.5  $\mu$ m, 120x0.075 mm, Waters) with a 30 min linear gradient of acetonitrile, 0.1% formic acid (7-35%) in 0.1% formic acid in water at a flow rate of 0.6  $\mu$ L/min using a nanoAquity UPLC (Waters, MA) and analyzed in a Thermo TSQ Vantage triple-quadrupole mass spectrometer with electrospray ionization. The instrument was operated in selected reaction monitoring mode with 10 ms dwell time and the peptides were monitored with collision energies optimized to maximize the signal. Peak areas were integrated using Skyline software [21].

**Selection of HDL peptides for targeted quantification.** Thirty-one proteins consistently detected in HDL in previous studies were selected for targeted quantification [8, 9, 15, 22, 23]. Based on these studies and considering the observed frequency, two to five peptides per protein were selected for parallel reaction monitoring quantification. We excluded peptides that are susceptible to *ex vivo* modification (e.g., containing methionine) and peptides with missing cleavage sites. Supplemental Table I shows a list of proteins and peptides monitored for targeted quantification by parallel reaction monitoring quantification PRM.

Next, we assessed the relationship among levels of individual peptides of each proteins using Pearson correlation. For each protein, two peptides with the best correlation were selected. Supplemental Table II shows the correlations between peptides for each protein. The chosen surrogate peptide is showed in the first column.

We used the same peptides chosen for the CPC study to serve as surrogate for proteins quantified in AIM-HIGH. Alpha-1-Microglobulin/Bikunin Precursor (AMBP) and Platelet basic protein (PPBP) were not quantified in the AIM-HIGH study. Moreover, the surrogate peptides used for the CPC study were not measured in AIM-HIGH samples for apolipoprotein E (APOE), apolipoprotein L1 (APOL1) and Phosphatidylcholine-sterol acyltransferase (LCAT). Therefore, different peptides were selected for these proteins (Supplemental Table II).

Among the proteins selected for HDL quantification, two different protein families containing highly homologous sequences were targeted. Serum amyloid A (SAA) 1, 2 and 4 were quantified for the SAA family, however, only SAA 1 and 2 share significantly homology. Two peptides shared by SAA1 and SAA2 were quantified, and they are termed as SAA1/2 peptides (Supplemental Table II). For the peptidase S1 family, one peptides shared by the proteins haptoglobin (HP) and haptoglobin-related protein (HPR) was quantified. This joint quantification is termed as HP/HPR in Supplemental Table II. In addition, one unique peptide to the protein HP and one to the protein HPR were also integrated (represented respectively as HP and HPR in Supplemental Table II).

## Supplemental Tables

**Supplemental Table I.** List of proteins and peptides monitored by parallel reaction monitoring in CPC study.

| Protein Name | Peptide Sequence     |
|--------------|----------------------|
| AMBP         | GECVPGEQEPELIPR      |
| AMBP         | ETLLQDFR             |
| APOA1        | DLATVYVDVLK          |
| APOA1        | DYVSQFEGSALGK        |
| APOA1        | VQPYLDDFQK           |
| APOA2        | EQLTPLIK             |
| APOA2        | SPELQAEAK            |
| APOA2        | EPCVESLVSQYFQTVTDYGK |
| APOA4        | LGEVNTYAGDLQK        |
| APOA4        | SELTQQLNALFQDK       |
| APOB         | IEIPLPFGGK           |
| APOB         | SVSLPSLDPASAK        |
| APOC1        | EFGNTLEDK            |

|        |                  |
|--------|------------------|
| APOC1  | EWFSETFQK        |
| APOC1  | TPDVSSALDK       |
| APOC2  | TAAQNLYEK        |
| APOC2  | TYLPAVDEK        |
| APOC2  | ESLSSYWESAK      |
| APOC3  | DALSSVQESQVAQQAR |
| APOC3  | LTPYADEFK        |
| APOC3  | DYWSTVK          |
| APOC3  | GWVTDGFSSLK      |
| APOC4  | AWFLESK          |
| APOC4  | ELLETVVNR        |
| APOC4  | DGWQWFWSPSTFR    |
| APOC4  | DLGPLTK          |
| APOD   | IPTTFENGR        |
| APOD   | NPNLPPETVDSLK    |
| APOD   | VLNQELR          |
| APOE   | AATVGSLAGQPLQER  |
| APOE   | SELEEQLTPVAEETR  |
| APOE   | LGPLVEQGR        |
| APOF   | SGVQQLIQYYQDQK   |
| APOF   | SLPTEDCENEK      |
| APOF   | SYDLDPGAGSLEI    |
| APOL1  | LNILNNNYK        |
| APOL1  | VTEPISAESGEQVER  |
| APOL1  | VAQELEEK         |
| APOL1  | ALDNLAR          |
| APOM   | AFLLTPR          |
| APOM   | DGLCVPR          |
| APOM   | SLTSCLDISK       |
| C3     | TGLQEVEVK        |
| C3     | TIYTPGSTVLRY     |
| CETP   | ASYPDITGEK       |
| CETP   | VIQTAFQR         |
| CETP   | GTSHEAGIVCR      |
| CLU    | ASSIIDELFQDR     |
| CLU    | LFDSDPITVTPVEVSR |
| CLU    | ELDESLQVAER      |
| HBB    | LLVVYPWTQR       |
| HBB    | SAVTALWGK        |
| HP     | VTIQDWVQK        |
| HP/HPR | GSFPWQAK         |
| HP/HPR | LPECEAVCGKPK     |

|        |                    |
|--------|--------------------|
| HPR    | VGYVSGWGQSDNFK     |
| LCAT   | SSGLVSNAPGVQIR     |
| LCAT   | STELCGLWQGR        |
| LCAT   | LEPGQQEEYYR        |
| LCAT   | TYSVEYLDSSK        |
| LPA    | GTLSTTITGR         |
| LPA    | TPAYYPNAGLIK       |
| PCYOX1 | LFLSYDYAVK         |
| PCYOX1 | LVCSGLLQASK        |
| PLTP   | AVEPQLQEEER        |
| PLTP   | FLEQELETITIPDLR    |
| PON1   | IFFYDSENPPASEVLR   |
| PON1   | IQNILTEEPK         |
| PON1   | STVELFK            |
| PON1   | SFNPNSPGK          |
| PON3   | AQALEISGGFDK       |
| PON3   | SVNDIVVLGPEQFYATR  |
| PON3   | LLNYPEDPPGSEVLR    |
| PPBP   | NIQSLEVIGK         |
| PPBP   | ICLDPDAPR          |
| RBP4   | LLNLDGTCADSYSFVFSR |
| RBP4   | YWGVASFLQK         |
| SAA1/2 | DPNHFRPAGLPEKY     |
| SAA1/2 | SFFSFLGEAFDGAR     |
| SAA4   | FRPDGLPK           |
| SAA4   | GPGGVWAAK          |
| VTN    | DVWGIEGPIDAAFTR    |
| VTN    | FEDGVLDPDYPR       |
| VTN    | GQYCYELDEK         |

**Supplemental Table II.** Pearson correlation between peptide pairs for HDL proteins quantified by parallel reaction monitoring in CPC subjects. The surrogate peptide is shown in the first column. The last column shows surrogate peptide for AIM-HIGH trial.

| Protein Name | Surrogate Peptide | Second Peptide     | r     | AIM-HIGH         |
|--------------|-------------------|--------------------|-------|------------------|
| AMBP         | ETLLQDFR          | GECVPGEQEPEPILIPR  | 0.716 | -                |
| APOA1        | VQPYLDDFQK        | DYVSQFEGSALGK      | 0.873 | VQPYLDDFQK       |
| APOA2        | SPELQAEAK         | EQLTPLIK           | 0.801 | SPELQAEAK        |
| APOA4        | LGEVNTYAGDLQK     | SELTQQLNALFQDK     | 0.864 | LGEVNTYAGDLQK    |
| APOB         | IEIPLPFGGK        | SVSLPSLDPASAK      | 0.874 | IEIPLPFGGK       |
| APOC1        | TPDVSSALDK        | EFGNTLEDK          | 0.781 | TPDVSSALDK       |
| APOC2        | TAAQNLYEK         | TYLPAVDEK          | 0.941 | TAAQNLYEK        |
| APOC3        | DALSSVQESQVAQQAR  | GWVTDGFFSLK        | 0.869 | DALSSVQESQVAQQAR |
| APOC4        | AWFLESK           | ELLETVVNR          | 0.901 | AWFLESK          |
| APOD         | VLNQELR           | NPNLPETVDSLK       | 0.755 | VLNQELR          |
| APOE         | LGPLVEQGR         | AATVGSLAGQPLQER    | 0.919 | AATVGSLAGQPLQER  |
| APOF         | SYDLDPGAGSLEI     | SLPTEDCENEK        | 0.507 | SYDLDPGAGSLEI    |
| APOL1        | ALDNLAR           | VAQELEEK           | 0.947 | VTEPISAESGEQVER  |
| APOM         | AFLTPR            | SLTCLDSK           | 0.797 | AFLTPR           |
| C3           | TGLQEVEVK         | TIYTPGSTVLYR       | 0.826 | TGLQEVEVK        |
| CETP         | VIQTAQFR          | ASYPDITGEK         | 0.949 | VIQTAQFR         |
| CLU          | LFDSDPITVTVPEVSR  | ASSIIDELFQDR       | 0.921 | LFDSDPITVTVPEVSR |
| HBB          | SAVTALWGK         | LLVYPWTQR          | 0.997 | SAVTALWGK        |
| HP           | VTSIQDWVQK        |                    |       | VTSIQDWVQK       |
| HP/HPR       | GSFPWQAK          | LPECEAVCGKPK       | 0.956 | GSFPWQAK         |
| HPR          | VGYSVSGWGQSDNFK   |                    |       | VGYSVSGWGQSDNFK  |
| LCAT         | TYSVEYLDSSK       | LEPGQQEEYYR        | 0.855 | LEPGQQEEYYR      |
| LPA          | GTLSTTITGR        | TPAYYPNAGLIK       | 0.979 | GTLSTTITGR       |
| PCYOX1       | LVCSGILLQASK      | LFLSYDYAVK         | 0.832 | LVCSGILLQASK     |
| PLTP         | FLEQELETITIPDLR   | AVEPQLQEEER        | 0.884 | FLEQELETITIPDLR  |
| PON1         | IQNILTEEPK        | STVELFK            | 0.913 | IQNILTEEPK       |
| PON3         | LLNYPEDPPGSEVLR   | AQALEISGGFDK       | 0.833 | LLNYPEDPPGSEVLR  |
| PPBP         | ICLDPDAPR         | NIQSLEVIGK         | 0.979 | -                |
| RBP4         | YWGVASFLQK        | LLNLDGTCADSYSFVFSR | 0.821 | YWGVASFLQK       |
| SAA 1 / 2    | SFFSFLGEAFDGAR    | DPNHFRPAGLPEKY     | 0.975 | SFFSFLGEAFDGAR   |
| SAA4         | GPGGVWAAK         | FRPDGLPK           | 0.781 | GPGGVWAAK        |
| VTN          | FEDGVLPDYPR       | GQCYELDEK          | 0.893 | FEDGVLPDYPR      |

## Major Resources Table

### Animals (in vivo studies)

| Species | Vendor or Source | Background Strain | Sex | Persistent ID / URL |
|---------|------------------|-------------------|-----|---------------------|
| NA      |                  |                   |     |                     |

### Genetically Modified Animals

|                 | Species | Vendor or Source | Background Strain | Other Information | Persistent ID / URL |
|-----------------|---------|------------------|-------------------|-------------------|---------------------|
| Parent - Male   | NA      |                  |                   |                   |                     |
| Parent - Female | NA      |                  |                   |                   |                     |

### Antibodies

| Target antigen | Vendor or Source | Catalog # | Working concentration | Lot # (preferred but not required) | Persistent ID / URL |
|----------------|------------------|-----------|-----------------------|------------------------------------|---------------------|
| NA             |                  |           |                       |                                    |                     |

### DNA/cDNA Clones

| Clone Name | Sequence | Source / Repository | Persistent ID / URL |
|------------|----------|---------------------|---------------------|
| NA         |          |                     |                     |

### Cultured Cells

| Name | Vendor or Source | Sex (F, M, or unknown) | Persistent ID / URL |
|------|------------------|------------------------|---------------------|
| NA   |                  |                        |                     |

### Data & Code Availability

| Description | Source / Repository | Persistent ID / URL |
|-------------|---------------------|---------------------|
| NA          |                     |                     |

### Other

| Description | Source / Repository | Persistent ID / URL |
|-------------|---------------------|---------------------|
| NA          |                     |                     |
